# Supplementary material
Source: Springer Nature journal article supplement (https://www.springermedizin.de/resource/supplementary/12955_2007_358_MOESM9_ESM.pdf/9560234)

a) Cross-lagged models

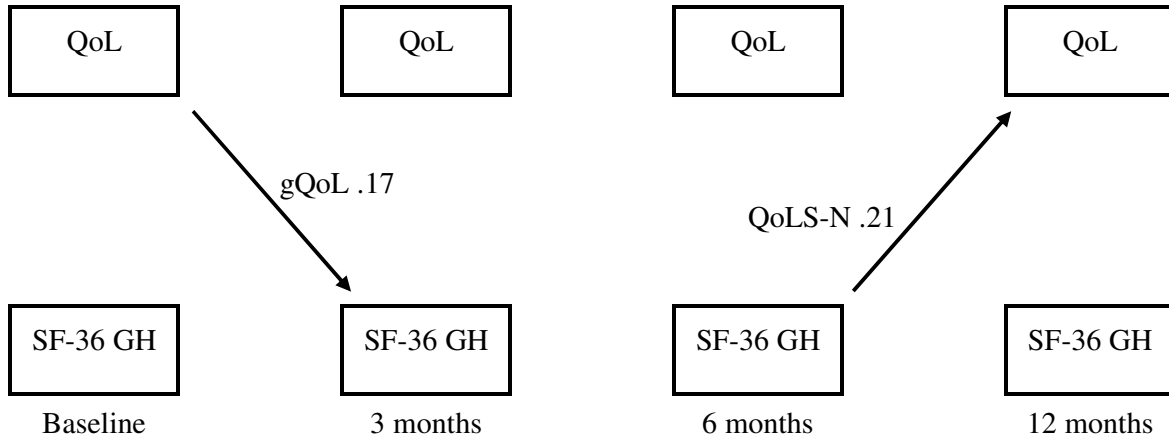

b) Simultaneous (reciprocal) effects models

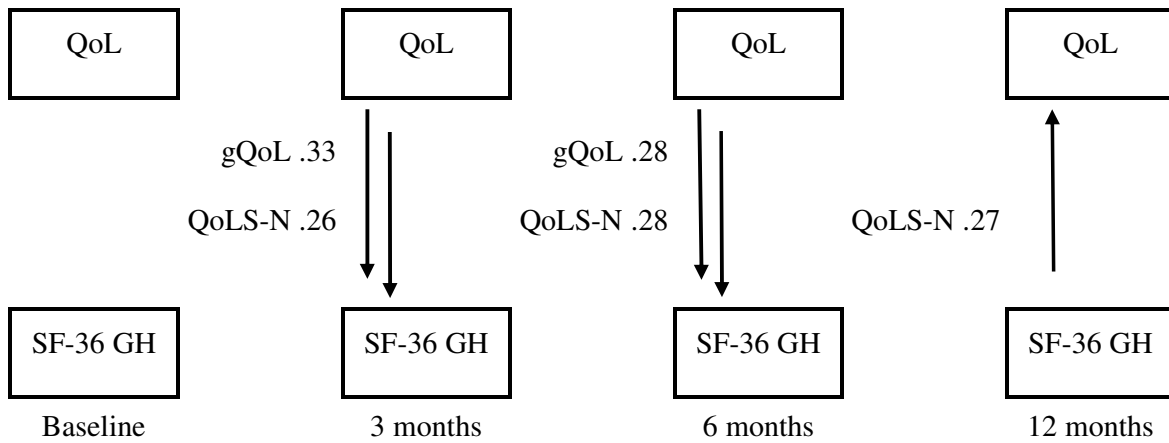

Supplement: MOESM9 [file 9560234]
